# Supplementary material for: Active and Inactive Cdc42 Differ in Their Insert Region Conformational Dynamics
Source: PubMed Central journal article supplement — Biophys J. 2020 Dec 19;120(2):306–18. doi: 10.1016/j.bpj.2020.12.007 (PMC7840443; doi:10.1016/j.bpj.2020.12.007), 2020-12-19
Supplement: mmc2.pdf [file mmc2.pdf]

# Active and Inactive Cdc42 Differ in Their Insert Region Conformational Dynamics

Nurit Haspel,<sup>1</sup> Hyunbum Jang,<sup>2</sup> and Ruth Nussinov<sup>2,3,\*</sup>

<sup>1</sup>Department of Computer Science, University of Massachusetts Boston, Boston, Massachusetts; <sup>2</sup>Computational Structural Biology Section, Frederick National Laboratory for Cancer Research in the Laboratory of Cancer Immunometabolism, National Cancer Institute, Frederick, Maryland; and <sup>3</sup>Department of Human Molecular Genetics and Biochemistry, Sackler School of Medicine, Tel Aviv University, Tel Aviv, Israel

**ABSTRACT** Cell division control protein 42 homolog (Cdc42) protein, a Ras superfamily GTPase, regulates cellular activities, including cancer progression. Using all-atom molecular dynamics (MD) simulations and essential dynamic analysis, we investigated the structure and dynamics of the catalytic domains of GDP-bound (inactive) and GTP-bound (active) Cdc42 in solution. We discovered substantial differences in the dynamics of the inactive and active forms, particularly in the “insert region” (residues 122–135), which plays a role in Cdc42 activation and binding to effectors. The insert region has larger conformational flexibility in the GDP-bound Cdc42 than in the GTP-bound Cdc42. The G2 loop and switch I at the effector lobe of the catalytic domain exhibit large conformational changes in both the GDP- and the GTP-bound systems, but in the GTP-bound Cdc42, the switch I interactions with GTP are retained. Oncogenic mutations were identified in the Ras superfamily. In Cdc42, the G12V and Q61L mutations decrease the GTPase activity. We simulated these mutations in both GDP- and GTP-bound Cdc42. Although the overall structural organization is quite similar between the wild type and the mutants, there are small differences in the conformational dynamics, especially in the two switch regions. Taken together, the G12V and Q61L mutations may play a role similar to their K-Ras counterparts in nucleotide binding and activation. The conformational differences, which are mainly in the insert region and, to a lesser extent, in the switch regions flanking the nucleotide binding site, can shed light on binding and activation. We propose that the differences are due to a network of hydrogen bonds that gets disrupted when Cdc42 is bound to GDP, a disruption that does not exist in other Rho GTPases. The differences in the dynamics between the two Cdc42 states suggest that the inactive conformation has reduced ability to bind to effectors.

**SIGNIFICANCE** Cell division control protein 42 homolog (Cdc42), a Ras superfamily and Rho family protein, acts in cancer metastasis and progression. Like Ras proteins, it switches between active GTP-bound and inactive GDP-bound forms. Rho family members have a helical “insert region” that plays a role in binding and activation. We simulated the active and inactive Cdc42, as well as two mutants: G12V and Q61L. We found that the inactive (GDP-bound) and active (GTP-bound) systems differ mainly in the conformational dynamics of the insert region and, to a lesser extent, in the switch regions flanking the nucleotide binding site. The high fluctuations in Cdc42-GDP, but not Rac-GDP, can disrupt the insert region integrity, reducing the inactive conformation ability to bind to effectors.

## INTRODUCTION

The cell division control protein 42 homolog (Cdc42) is a Rho family protein, a subgroup of the Ras superfamily, which regulates cellular activities, including cytoskeletal organization, gene expression, and transformation (1–8). Superfamily members have been linked to multiple human

cancers (9–15). These proteins act as molecular switches between active GTP-bound and inactive GDP-bound forms. The best-characterized members of the Rho family are RhoA, Rac1, and Cdc42. Cdc42 controls filopodia formation. Filopodia are actin-rich fingers that establish the direction of motility. Rac1 controls lamellipodia formation—actin-rich ruffles at the leading edge of the cell that initiate motion—and Rho controls the establishment of stress fibers whose formation results in the contractile force that moves the body of the cell behind the leading edge (3,16). Increasing evidence has validated Cdc42 as involved in cancer metastasis and progression and has

Submitted October 5, 2020, and accepted for publication December 10, 2020.

\*Correspondence: [nussinov@mail.nih.gov](mailto:nussinov@mail.nih.gov)

Editor: Alexandr Kornev.

<https://doi.org/10.1016/j.bpj.2020.12.007>

© 2020 Biophysical Society.

This is an open access article under the CC BY-NC-ND license (<http://creativecommons.org/licenses/by-nc-nd/4.0/>).

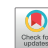



(47,48). K-Ras4B Gly12, Gly13, and Gln61 mutants decrease GAP-assisted hydrolysis rate drastically with respect to the wild type, but that of Q61L and G12A is still ~15- to 25-fold higher than their intrinsic hydrolysis rates, which may indicate that a portion of the GAP-dependent catalytic mechanism is still somewhat functional in these mutants (47). Gln61 is involved in hydrogen bonding with a catalytic water molecule, Arg789 of GAP, and the GTP molecule, initiating a nucleophilic attack that hydrolyzes GTP. The Q61L mutation stabilizes the active GTP-bound form. Mutations in residues 12 and 13 disrupt the catalysis-favored arrangement of Gln61, as well as the hydrogen bonding of the backbone of residue 13 with GTP through steric hindrance. In *KRAS*-driven cancer, Gly12 mutations (89%) are predominant, followed by Gly13 (9%) and Gln61 (1%) mutations (49). Recent studies shed more light on the structural basis of the nucleotide (GDP or GTP) binding pockets of the wild type and mutants of the K-Ras4A and K-Ras4B proteins (48,50). The catalytic domain of GDP-bound K-Ras4A has a more exposed nucleotide binding pocket than K-Ras4B, and the dynamic fluctuations in the switch I and II regions also differ. The wild-type K-Ras4B-GTP exists in two (active and inactive) conformations (48). Mutations in Gly12 and Gly13 differentially elicit an inactive-to-active conformational transition in K-Ras4B-GTP. In K-Ras4B-GDP, the mutants expose the bound nucleotide, which facilitates the GDP-to-GTP exchange.

A recent study shed light on the dimerization of IQGAPs through interaction of the GAP-related domain 2 (GRD2) of IQGAP2 with the active GTP-bound Cdc42 (34,51). Importantly, the study revealed that the GTP-bound Rac1 displays only single-site binding to the GRD2 as opposed to Cdc42, which binds the GRD2 in two sites, indicating that only Cdc42 promotes IQGAP2 dimerization. More specifically, residues 25–38 (switch I) and 57–75 (switch II) are involved in contacts with GRD2, and Cdc42 binding promoted allosteric changes in the RasGAP site, providing a binding site for the second Cdc42 (34). Cdc42 insert region was essential for the binding. As a result of the differences in the sequence and structure of the insert region, Rac1 could bind only to the RasGAP site of apo-GRD2 and was unable to mediate IQGAP2 dimerization. Like the Ras isoforms, Cdc42 can bind to the membrane through the interactions of its positively charged hypervariable region (HVR) with lipids (52–57). The C-terminal Cys gets a geranylgeranyl post-translational modification (PTM), which can be inserted into the membrane, anchoring the protein.

In this study, we aim to figure out the role of the insert and the switch regions in the active and inactive forms. We performed explicit MD simulations of the catalytic domain of Cdc42 in the active (GTP-bound) and inactive (GDP-bound) states. Additionally, we simulated the G12V and Q61L mutants of the two states to reveal their impact on both states. Being located on the P-loop and switch II regions, respectively, these two residues are involved in interaction with

the active site. We found that the insert region exhibits much larger conformational flexibility in the GDP-bound state than in the GTP-bound state in both the wild type and mutant systems. This is interesting because the insert region does not interact directly with the binding site. The switch I and II regions undergo conformational changes in both cases, but to a lesser extent. We also show that the mutants affect the binding site exposure to the solvent and the interactions with other amino acids, Tyr32 and Thr35, near the binding site. This may indicate that the mutants play a similar role in GTP hydrolysis as in K-Ras4A and K-Ras4B and other Ras proteins (41,58–61).

## MATERIALS AND METHODS

### Preparation of models

The GDP-bound and GTP-bound Cdc42 proteins were modeled based on the crystal structures (Protein Data Bank, PDB: 4DID (chain A) and PDB: 4JS0 (chain A), respectively) (Fig. 1) and represented in full atomic level. We replaced the 4JS0 GNP molecule with GTP and removed the inhibitor bound to it. Missing side chains and hydrogen atoms were added using the CHARMM software (62). The G12V and Q61L mutants were modeled using CHARMM as well, using the wild-type system as a starting point. The simulations were conducted using the CHARMM force field (62). The solvent was represented explicitly using the TIP3P model. The charge of all potential titratable groups was fixed at values corresponding to neutral pH (i.e., all acidic and basic side chains were represented in their negatively and positively charged forms, respectively). We used a cubic simulation box with periodic boundary conditions and the nearest image convention. Atom pair cutoff distance was set at 14.0 Å to compute the van der Waals (vdW) interactions. To avoid discontinuities in the potential energy function, nonbonding energy terms were forced to slowly converge to zero by applying a smoothing factor from a distance of 12.0 Å. The non-truncated electrostatic potential was computed through particle mesh Ewald (PME) summations. We used a charge mesh with a grid thickness of one point per cubic Å. Na<sup>+</sup> and Cl<sup>-</sup> ions were added to each system to neutralize the charge and simulate physiological conditions. Overall, the wild-type GDP-bound system had 74,197 atoms, and the wild-type GTP-bound system had 74,290 atoms.

### Simulation protocol

All simulations were performed using the NAMD 2.13 software package (63) and carried out according to our previously published protocol (4,22,34,48,50,64). First, the potential energy was minimized by using 10,000 conjugate gradient steps. Then, the protein atoms were held fixed while the solvent was heated to a temperature of 310 K to ensure uniform distribution of the ions in solution. Next, the system was isothermally and isobarically equilibrated at 310 K and 1 bar (NPT conditions) to allow reaching infinite dilution conditions (i.e., water density close to 1 g/cm<sup>3</sup>) for 500 ps. Later, the solute was allowed to move, and the whole system was heated and equilibrated (50 ps) at the production temperature of 310 K and pressure of 1 bar. A numerical integration time step of 2 fs was used for all the simulations, and the nonbonded pair list was updated every five steps. In the production runs, the constant temperature of 310 K was maintained by the Langevin temperature control, and the pressure at 1 atm was sustained by the Nosé-Hoover Langevin piston pressure control. During the production runs, the trajectories were recorded every 50,000 steps (25 ps) for subsequent analysis, and in all cases, the production simulations were run for a period of 500 ns each, totaling 3 μs. The first 30 ns were removed from the analysis to ensure equilibration. The analysis

was done using the VMD (65), ProDy (66), and MATLAB (The MathWorks, Natick, MA) software packages.

## RESULTS

### Nucleotide-dependent conformational changes of the insert region

We performed explicit MD simulations on the catalytic domains of the wild-type Cdc42 (hereafter referred to as Cdc42) and the G12V and Q61L Cdc42 mutants (denoted as Cdc42<sup>G12V</sup> and Cdc42<sup>Q61L</sup>, respectively) in the GTP- and GDP-bound states. During the simulations, we observed that there are significant differences in the conformational flexibility of the insert region. The insert region maintains its helical structure in the GTP-bound systems (Fig. 2 A) but loses some of its helical conformation in the GDP-bound systems (Fig. 2 B). Although the crystal structures of Cdc42 exhibited a helical conformation of the insert region for both GTP- and GDP-bound systems, the GDP-bound crystal structure showed much higher *B*-factor values, especially in the insert region (Fig. S1). For Cdc42-GTP, the averaged root mean-square deviation (RMSD) of the insert region is  $1.4 \pm 0.2$  Å, whereas it is  $3.9 \pm 0.8$  Å for Cdc42-GDP. The overall RMSD of the entire system is also a little higher

for the GDP-bound system, but the difference is smaller:  $1.8 \pm 0.2$  Å vs.  $2.4 \pm 0.2$  Å for the GTP- and GDP-bound systems, respectively. Similar results are observed in the mutants (see Table 1). The main loss of helical integrity in Cdc42-GDP starts in the beginning of the simulation. In Cdc42-GTP, the active regions consisting of the insert region, switch I, and switch II maintained closer distance to GTP than in the GDP-bound state (see structures in Fig. 2). The switch regions come close to the binding site to form interactions with GTP in the active site, whereas upon hydrolysis, the loops open to allow GDP to dissociate. This has been shown to be the case in K-Ras4B as well (48). The average distances between the C<sub>α</sub> atom of the middle residue in the loop (Glu31) and the P<sub>β</sub> atom of the GTP/GDP molecule are  $12.3 \pm 0.4$  and  $14.0 \pm 1.0$  Å for the GTP- and GDP-bound Cdc42, respectively. The average distances between Gln61 (on switch II) and the GTP/GDP molecule are  $9.3 \pm 0.3$  and  $11.5 \pm 1.0$  Å for the GTP- and GDP-bound Cdc42, respectively.

To monitor the fluctuations of individual residues in Cdc42, we measured the root mean-square fluctuations (RMSFs) for each amino acid in both the GTP- and GDP-bound systems. In general, the GTP-bound systems (Fig. 3 A) showed less fluctuations than the GDP-bound systems (Fig. 3 B). We observed that the insert region showed the greatest difference. The RMSF was higher in the GDP-

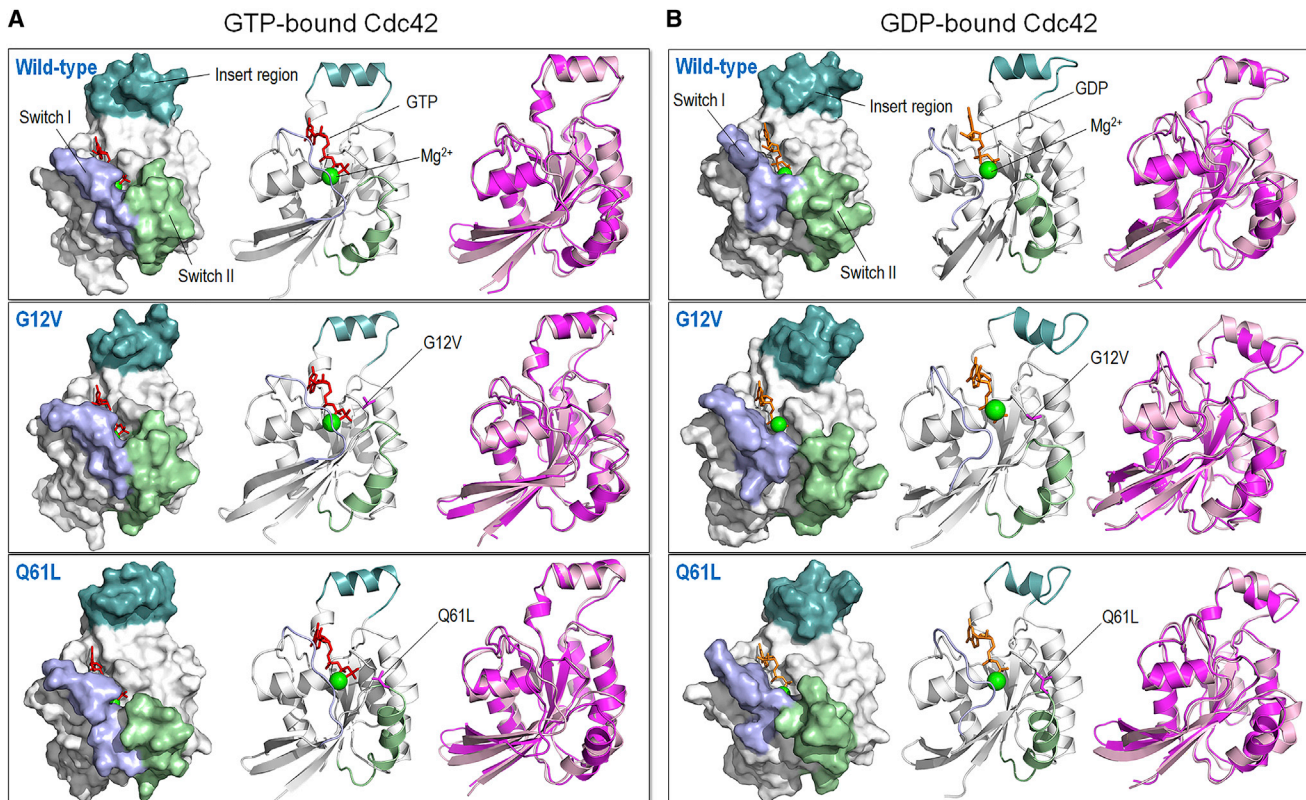

FIGURE 2 Snapshots depicting the final conformation in surface and cartoon representations, and superimposition of the final (*magenta cartoon*) and initial (*pink cartoon*) configurations of the wild type and two mutants of (A) the GTP-bound and (B) GDP-bound Cdc42. The insert region (*light teal*) loses its structural integrity in all the GDP-bound systems but not in the GTP-bound systems. To see this figure in color, go online.

**TABLE 1 The Averaged RMSD of the Entire Protein and the Insert Region (Residues 122–135)**

| System                     | RMSD (Å)  |               |
|----------------------------|-----------|---------------|
|                            | Total     | Insert Region |
| Cdc42-GTP                  | 1.8 ± 0.2 | 1.4 ± 0.2     |
| Cdc42 <sup>G12V</sup> -GTP | 1.8 ± 0.1 | 1.6 ± 0.2     |
| Cdc42 <sup>Q61L</sup> -GTP | 2.2 ± 0.3 | 1.5 ± 0.2     |
| Cdc42-GDP                  | 2.4 ± 0.2 | 3.9 ± 0.8     |
| Cdc42 <sup>G12V</sup> -GDP | 2.2 ± 0.2 | 3.3 ± 0.6     |
| Cdc42 <sup>Q61L</sup> -GDP | 2.5 ± 0.2 | 3.5 ± 0.8     |

bound systems in both the wild type and mutants, indicating much greater fluctuations for this region. In the GTP-bound systems, the two switch regions show lower RMSF than the insert region, except the Q61L mutant. In both the GTP- and GDP-bound Cdc42, the switch I and II regions exhibit RMSF peaks because both regions interact directly with the binding site. There are differences between the wild type and mutants, but they all follow the same trend. In the GTP-bound systems, the Q61L mutant exhibits higher fluctuations in the two switch regions—especially switch

II—whereas the G12V mutant showed approximately the same mean fluctuations as the wild type. The Q61L mutant binding site residues, especially the mutated Leu61, interact with the nucleotide only intermittently, whereas the wild-type and the G12V mutant show more constant interactions, which indicates that the Q61L mutant may sample inactive conformations (see below). In the GDP-bound case, all the systems show high fluctuations in the insert regions despite the mutations being located elsewhere on the protein. In the other two regions that show higher fluctuations, corresponding approximately to the switch I and II regions, the G12V mutant exhibits the largest fluctuations, whereas the Q61L fluctuates a little less than the wild type.

**Essential dynamic analysis reveals different conformational dynamics between the GTP- and GDP-bound Cdc42**

To measure how they differ in their essential modes of motion, we performed essential dynamics analysis on the six systems. The analysis included principal component

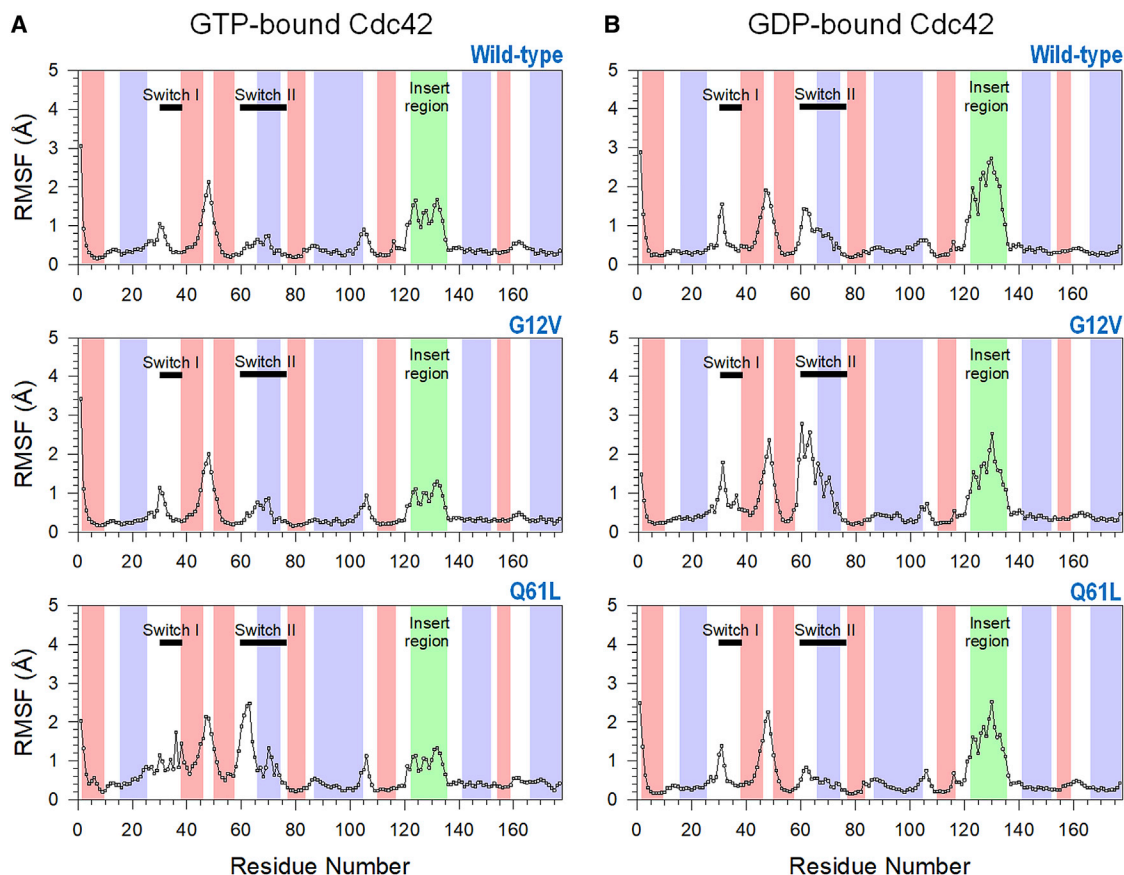

**FIGURE 3** The root mean-square fluctuations (RMSFs) for (A) the GTP-bound and (B) GDP-bound Cdc42 as a function of the residue number. The thick black bars denote the locations of the switch I and switch II regions, and the light-green background corresponds to the insert region in each figure. The backgrounds with light red and blue denote the  $\beta$ -sheet and  $\alpha$ -helical secondary structures of the protein, respectively. Although the two switch regions and the insert region exhibit the largest fluctuations in all systems, the insert region fluctuates much more in the GDP-bound systems. The switch II region fluctuates more in the Cdc42<sup>Q61L</sup>-GTP and Cdc42<sup>G12V</sup>-GDP systems. To see this figure in color, go online.

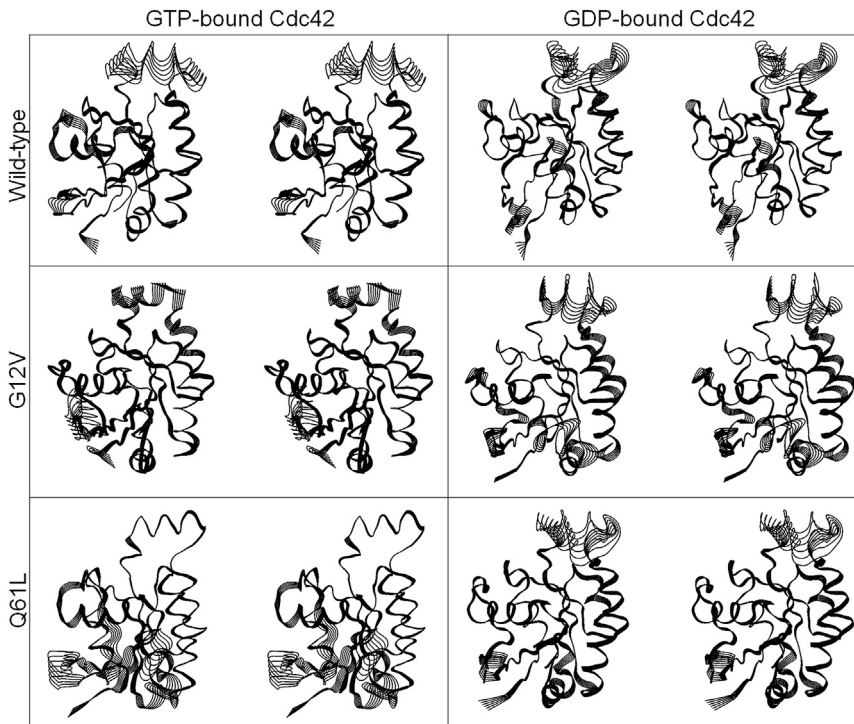

FIGURE 4 Superimpositions of protein motion at the main normal mode with the lowest-frequency motion in stereo pair view for the wild-type and mutant GTP-bound (left column) and wild-type and mutant GDP-bound (right column) Cdc42. The images show the full range of motion for each residue. The motion clearly shows the loss of insert region integrity in the GDP-bound systems and the conformational flexibility of the switch I and switch II regions. Although the insert region has a visible range of motion in the GTP-bound wild-type and G12V mutant, it still maintains its helical structure.

analysis (PCA) and residue-residue cross correlations. The PCA analysis reveals major differences between the GTP- and GDP-bound systems, illustrating the directions of the main mode of motion for the six Cdc42 systems (Fig. 4). The main mode of motion is the lowest-frequency motion, corresponding to the global motion of the protein. For Cdc42-GTP, the largest motions are in the G2 loop, the region before the start of switch I. In the wild-type Cdc42-GTP, there is also a large motion in the insert region, even though the insert region itself does not lose its integrity but moves as a whole with respect to the rest of the protein. The regions with the largest motions are highly correlated with the largest RMSF values (Fig. 3). For Cdc42-GDP and the mutants, the largest motion is in the insert region.

We calculated the PCA projection of the six systems. The projection of the first three principal components is presented for the wild-type and mutant systems in the GTP-bound (Fig. 5 A) and GDP-bound states (Fig. 5 B). In the projections, we clustered the principal components using linkage clustering, which allows us to select the desired number of clusters. We searched for between two and three distinct clusters shown in different colors; clusters 1, 2, and 3 are denoted as blue, green, and red, respectively. Searching for more than three clusters did not result in significantly sized clusters. In the case of Cdc<sup>G12V</sup>-GTP, we obtained two clusters, and all the other systems produced three clusters. For Cdc42-GTP, cluster 1 appears in 28.1% of the conformations (around 100–250 and 350–450 ns of the simulation). Cluster 2 appears in ~68.2% of the conformations and is dominant in the beginning and middle of the simula-

tion. A small but distinct third cluster exists in only 3.5% of the conformations and appears toward the end of the simulation. The superimposition of representative structures from the clusters illustrates that they differ mainly in the configuration of the switch I region and in the position of the insert region with respect to the rest of the protein (Fig. S2). The G2 loop gets farther from the binding site. However, in all cases, the Thr35 and Tyr32 side chains face the GTP binding site, interacting with it. For Cdc42<sup>G12V</sup>-GTP, we obtained only two clusters. The difference between them is noticeable mostly in the switch I region. Cluster 2 appears in 67% of the conformations, and cluster 1 appears intermittently in the middle and is dominant in the end of the simulation. For Cdc42<sup>Q61L</sup>-GTP, cluster 1 appears mostly in 200–400 ns of the simulation and is responsible for 38% of the conformations. Cluster 2 appears in the end of the simulation and is responsible for 20% of the conformations. Cluster 3 appears in the first half of the simulation and is responsible for 42% of the conformations. As in the case of the wild type, the main difference between the three clusters is in the switch I region, where the loop gets farther from the binding site. In cluster 1, the Tyr32 side chain faces away from the GTP, resulting in loss of interaction toward the middle of the simulation. In the case of Cdc42-GDP, the clusters differ in the conformations of the insert region and the switch II loop. Clusters 1, 2, and 3 appear in 17, 25, and 58% of the conformations during the simulations. Cluster 1 appears in the first 80 ns of the simulation, and again toward the end. Then, cluster 2 is more common throughout 80–200 ns. Cluster 3 appears

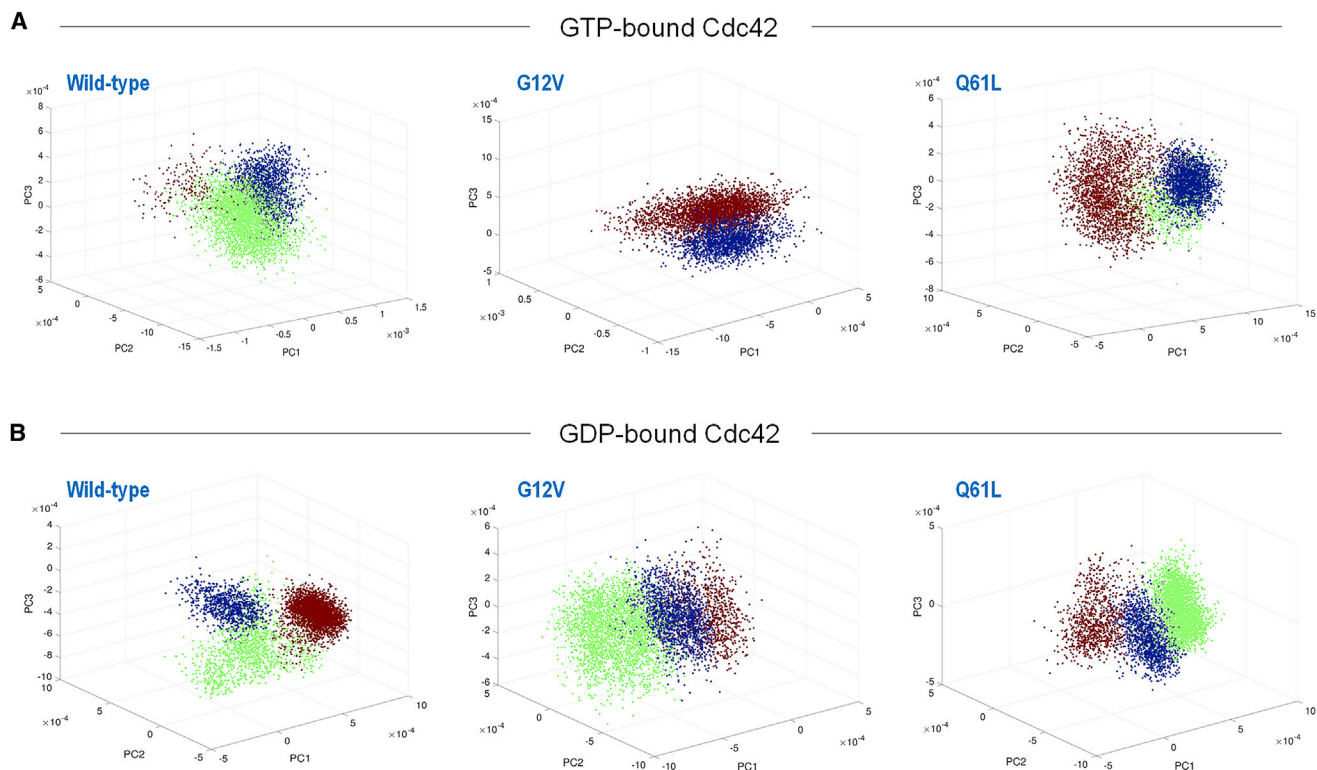

FIGURE 5 The projection of the first three principal components, PC1, PC2, and PC3, for the (A) GTP-bound and (B) GDP-bound Cdc42. The PCA projection was subject to linkage clustering, and each cluster is shown in a different color. All the systems show three clusters, except the GTP-G12V mutant, which has two. Representatives of the clusters are shown in Fig. S2. To see this figure in color, go online.

throughout the rest of the simulation (Fig. S2). It appears that the second principal component probably corresponds to the insert region and switch II conformational changes. Cluster 2 differs from the two other clusters in the conformation of the switch I region. On the PC projection, the main difference is along the first principal component. For Cdc42<sup>G12V</sup>-GDP, the clusters appear at 30, 52, and 18% of the conformations, respectively. Cluster 1 appears between 80 and 250 ns, cluster 2 dominates the middle and end of the simulation, and cluster 3 appears in the first 80 ns. For Cdc42<sup>Q61L</sup>-GDP, there are also three clusters. Cluster 1 differs from the other two mostly in switch I, but all clusters differ also in the conformation of switch II and the insert region. Cluster 1 appears in 50–200 ns of the simulations and in 26.5% of the conformations. Cluster 2 appears toward the middle and end, with a frequency of 56%. Cluster 3 appears mostly in the beginning, in 17.5% of the conformations. In all three clusters, the side chains of Thr35 and Tyr32 tend to face away from the GDP group. The main backbone difference between the clusters resides in the insert region conformation.

We compared the most populated cluster of Cdc42-GTP with the crystal structure of the GTP-activated Cdc42 (PDB: 5CJP) bound to the GRD of IQGAP2 (Fig. S3). The Cdc42 conformation when bound to GRD2 is very similar to the most populated structure. The overall RMSD was

0.97 Å, including the position of the GTP, even though the simulation did not include the GRD or any other effector binding. Conversely, when a representative of the most populated cluster of Cdc42-GDP was superimposed on the same GRD-bound Cdc42, the RMSD was larger (1.34 Å). Most importantly, the insert region is positioned in a very different way toward the GRD. This further supports the hypothesis that the presence of GDP hinders the conformation of the insert region and, hence, the binding to effectors.

To observe how individual residue motion affects the protein conformation, the dynamic cross correlation map representing the covariance of residues in the insert region and two switch regions, as measured by the PCA analysis, were calculated (Fig. 6). The differences between the GTP-bound and GDP-bound systems are visible, but a closer focus gives us more insight into the important regions (between the switch I and insert regions, the switch II and insert regions, and the switch I and II regions (Fig. S4)). The most prominent correlation is a strong negative correlation between the switch I region and the insert regions of both GTP-bound and GDP-bound systems. Switch I undergoes the largest conformational changes in Cdc42-GTP, while the insert region is rather stable. In Cdc42-GDP, the insert region, which undergoes the largest conformational change throughout the simulation, shows a slightly weaker negative correlation with the two switch regions. There

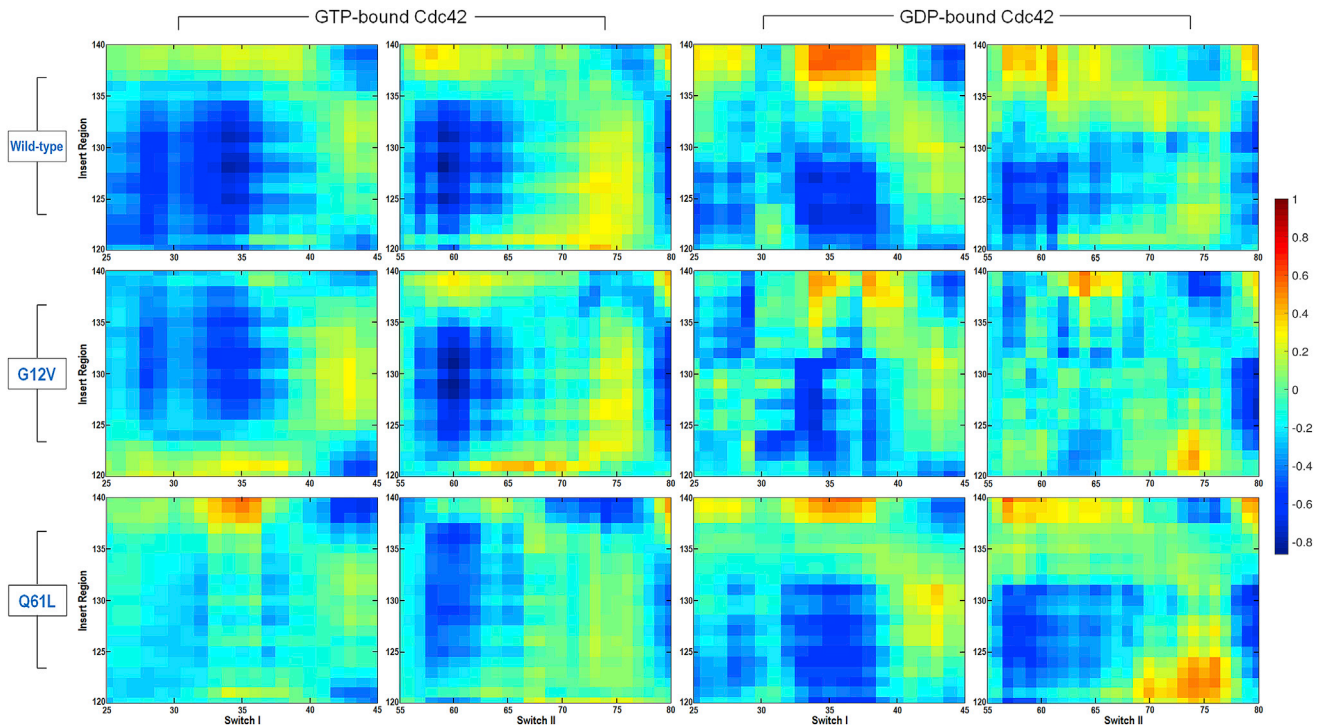

FIGURE 6 Dynamic cross correlation map representing the covariance of residues between the switch I and insert region regions, and the switch II and insert region for the GTP-bound (*left panels*) and GDP-bound (*right panels*) Cdc42. The cross correlation values are depicted on a scale from blue to red. The figure shows big differences in the cross correlation between the GTP-bound and GDP-bound systems. In particular, the wild-type and G12V GTP-bound systems show stronger negative cross correlation between the insert region and the two switch regions (especially switch I). Weaker correlations are observed in the GTP-bound Q61L mutant. To see this figure in color, go online.

are several visible differences between the GTP-bound and GDP-bound systems, as well as between the wild type and mutants in each case. The Cdc42<sup>G12V</sup>-GTP behaves in a similar way to the wild type, but in the Cdc42<sup>Q61L</sup>-GTP, the mutations cause a stronger positive correlation in the motion of the two switches but a weak correlation between switch I and II and the insert region. In contrast, in the GDP-bound systems, the Cdc42<sup>Q61L</sup>-GDP shows a stronger positive correlation between the two switch regions (Fig. S4), similar to the Cdc42-GTP systems. Notice that even though the conformational change pattern is similar between the wild type and the mutants in the GDP-bound state (in all cases the insert region undergoes large-scale changes), there is a marked difference in the cross correlation pattern.

### Interactions between CDC42 and the nucleotide around the binding site

Several residues are involved in the binding of Ras superfamily proteins with the nucleotide—in particular, Gly12/Val12, Ala13, Tyr32, Thr35, and Gln61 (37,47). We calculated the potential of mean force (PMF) along the reaction coordinates  $d_1$ , defined as the distance between the C $_{\alpha}$  atom of Gly60 and the P $_{\beta}$  atom (the second phosphorus) in the GTP/GDP molecule, and  $d_2$ , defined as the distance between the C $_{\alpha}$  atom of Thr35 and the P $_{\beta}$  atom in the nucleotides (Fig. 7). The choice

of distances was made to compare with the results obtained for K-Ras4B and K-Ras4A in our previous studies (40,48,50). The PMF profiles allow us to detect regions of energy minima and elucidate active and inactive states. In all GTP-bound systems, the distance between the C $_{\alpha}$  atom of Thr35 and the P $_{\beta}$  atom in the nucleotides was stable, as well as in the GDP-bound Q61L mutant. The main difference was in the distance of Gly60 from the P $_{\beta}$  atom, which was still stable in the GTP-bound systems but fluctuated in the GDP-bound systems, in particular the GDP-bound G12V mutant. In addition to these atoms, we also measured the distances from the C $_{\alpha}$  atom of Ala13, the OH group of Tyr32, the O $_{\gamma}$  group of Thr35, and the C $_{\delta}$  atom of Gln61 (or Leu61 in the Q61L mutants) to the P $_{\beta}$  atom to monitor the side-chain orientation (Fig. S5). The distances are summarized in Table 2. As expected, the GDP-bound systems fluctuate more than the GTP-bound systems. In the GTP-bound systems, Ala13 and Thr35 show stable distances from the GTP molecule, indicating that the G2 loop and the switch I loop maintain close, consistent distance from the GTP. Tyr32 fluctuates throughout the simulation, but to a lesser extent than the GDP-bound system. The distances are usually between  $\sim 6$  and  $8$  Å, with a few spikes to  $\sim 12$ – $14$  Å, indicating that, at times, the Tyr32 side chain faces away from the GTP. In both the wild-type and the G12V mutant of Cdc42-GTP, Gln61 maintained a rather stable distance



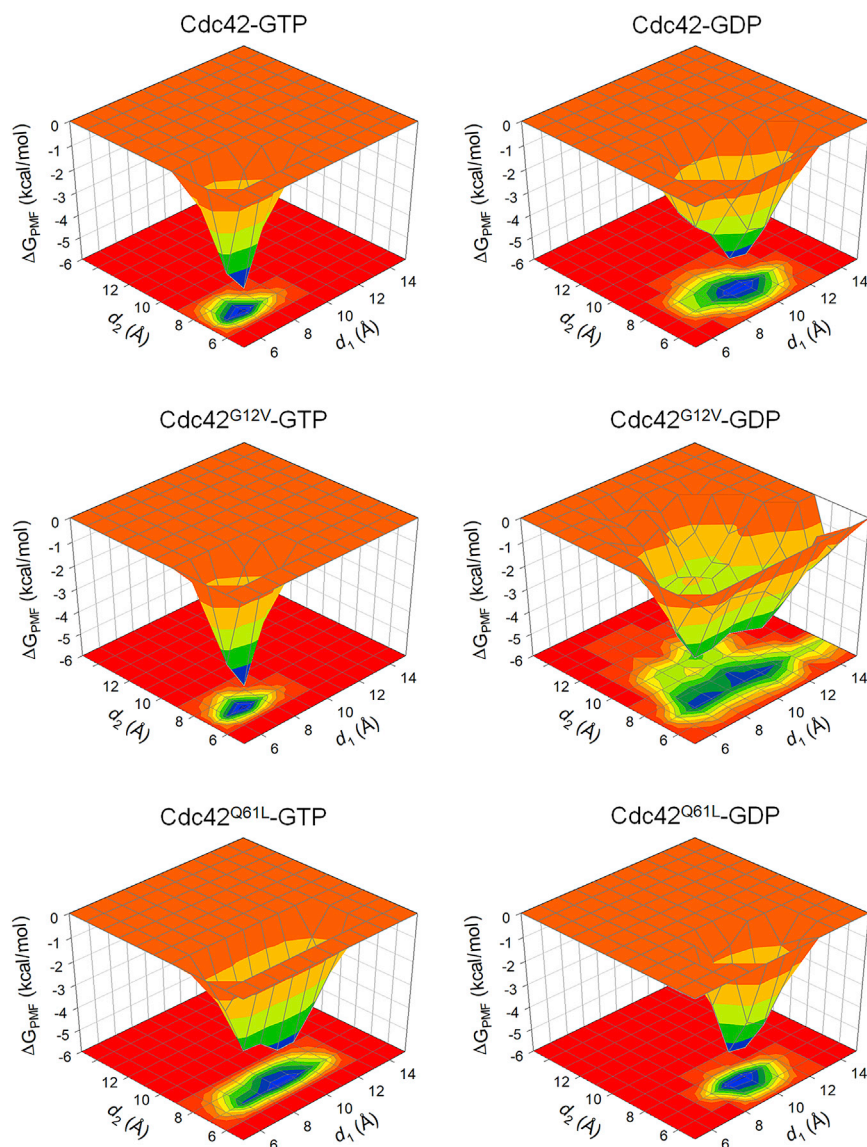

FIGURE 7 The potential of mean force ( $\Delta G_{\text{PMF}}$ ) along the reaction coordinates  $d_1$  (defined by the distance from G60-C $\alpha$  to GTP/GDP-P $\beta$  atom) and  $d_2$  (defined by the distance from T35-C $\alpha$  to GTP/GDP-P $\beta$ ). As seen, the distances are very stable in the GTP-bound systems and the GDP-bound Q61L mutant. Both  $d_1$  and  $d_2$  fluctuate more in the GDP-bound G12V mutant, and they fluctuate to a lesser extent in the GDP-bound wild type. To see this figure in color, go online.

of  $\sim 8\text{--}10$  Å from the nucleotide group. In the Q61L mutant, the distance of the CD1 atom of Leu61 was larger and less stable, indicating loss of interaction. In the GDP-bound systems, the largest fluctuations are observed with respect to the Tyr32 and, in the case of the G12V mutant and to a lesser extent the wild-type GDP, also with respect to the Thr35 interactions. The distances between these two residues and the GDP molecule fluctuate between  $\sim 8$  and  $\sim 14\text{--}16$  (for Thr35) and  $22$  Å (for Tyr 32) throughout the simulation. This shows that, for most of the simulation time, the two residues lose their interaction with the GDP, except for short periods. The distances are also larger than in the GTP-bound systems, which is consistent with the GDP-bound molecules having an open conformation. In the K-Ras4B simulations, we observed that several mutants also caused a near-total loss of switch I interactions with the GDP. The distance of Ala13 from the GDP is rather stable in all the GDP-bound

systems, whereas Gln/Leu61 had a larger distance from the GDP than the GTP-bound systems. As in the K-Ras4B simulations (48), the distance between Thr35 and the GDP fluctuated.

## DISCUSSION

In this work, we used MD simulations and essential dynamics analysis to investigate the structural and dynamical properties of the GTP-bound (active) and GDP-bound (inactive) Cdc42. We found that the active and inactive systems differ significantly in their dynamical properties, especially in areas formerly characterized to be important for activation or for binding with the GRD of IQGAP2 (34,67). Specifically, we show that GDP-bound Cdc42 exhibits much larger conformational flexibility in the insert



the large fluctuations of switch I and switch II lead to GDP slipping from the catalytic site, resulting in the interactions of Asp118 and Gln116 with the guanine group of GDP, which becomes unstable (Fig. S7). This induces large fluctuations in the  $^{117}\text{xDLRx}^{121}$  motif and, hence, the unstable insert region. Pro123 plays a role in reducing the stability of the insert region, disrupting the  $\alpha$ -helical secondary structure. We found that in the Cdc42-GDP, Lys131 in the insert region forms a salt bridge with Glu91 in helix  $\alpha 3$ . The salt bridge, appearing in  $\sim 10\%$  of the conformations, may help in maintaining the disordered helical conformation.

Unlike Cdc42-GDP, both Rac1-GDP and Rac2-GDP yield stable  $\alpha$ -helical structures for both the  $^{117}\text{xDLRx}^{121}$  motif and the insert region (Fig. 8 C). During the simulations, we observed that stable salt bridge interactions between the side chains of the residues enhance the stability of the insert region for both Rac proteins, preserving the  $\alpha$ -helical secondary structure (Fig. S7). Based on the sequence, we note that Rac proteins intrinsically possess a more stable insert region than Cdc42. For Rac proteins, in addition to Asp118, Lys116 plays a critical role in enhancing the interaction with the guanine group of GDP, preventing GDP's slip from the catalytic site due to large fluctuations of switch I and switch II. Lys116 of Rac proteins forms a salt bridge with GDP, but Gln116 of Cdc42 does not (Fig. 8). Unlike Pro123 of Cdc42, Lys123 of Rac proteins contributes the stable insert region  $\alpha$ -helix through the salt bridge formation with Asp12, which is absent from Cdc42.

We also simulated and analyzed two mutants, G12V and Q61L, that play a role in GTPase activation (44,71). Our results show that the differences in dynamics and structure between the wild type and the mutants are smaller than the differences between the wild-type GTP and GDP. The main differences involve the conformational dynamics of the switch I and switch II regions, which are associated with IQGAP2 binding. Collectively, our results can shed light on the dynamic differences between the active and inactive conformation caused by the differences in the conformational flexibility of the insert region, which may explain their different levels of activity.

## SUPPORTING MATERIAL

Supporting Material can be found online at <https://doi.org/10.1016/j.bpj.2020.12.007>.

## AUTHOR CONTRIBUTIONS

N.H., H.J., and R.N. conceived and designed the study. N.H. performed MD simulations and prepared the first draft. N.H. and H.J. analyzed the data, generated figures, and wrote the manuscript. All authors edited and approved the manuscript.

## ACKNOWLEDGMENTS

This project has been funded in whole or in part with federal funds from the National Cancer Institute, National Institutes of Health, under contract HHSN261200800001E. The content of this publication does not necessarily reflect the views or policies of the Department of Health and Human Services, nor does mention of trade names, commercial products or organizations imply endorsement by the US Government. This research was supported (in part) by the Intramural Research Program of NIH, National Cancer Institute, Center for Cancer Research. The simulations were run in part on the UMass Boston research cluster and the Massachusetts Green High Performance Computing Center (MGHPCC) cluster and in part on the high-performance computational facilities of the Biowulf PC/Linux cluster at the National Institutes of Health, Bethesda, MD (<https://hpc.nih.gov/>).

## REFERENCES

- Zong, H., K. Kaibuchi, and L. A. Quilliam. 2001. The insert region of RhoA is essential for Rho kinase activation and cellular transformation. *Mol. Cell. Biol.* 21:5287–5298.
- Ridley, A. J. 2001. Rho GTPases and cell migration. *J. Cell Sci.* 114:2713–2722.
- Owen, D., L. J. Campbell, ..., H. R. Mott. 2008. The IQGAP1-Rac1 and IQGAP1-Cdc42 interactions: interfaces differ between the complexes. *J. Biol. Chem.* 283:1692–1704.
- Jang, H., S. Muratcioglu, ..., R. Nussinov. 2016. Membrane-associated Ras dimers are isoform-specific: K-Ras dimers differ from H-Ras dimers. *Biochem. J.* 473:1719–1732.
- Liu, L., L. Zhang, ..., L. Gu. 2019. Non-canonical notch signaling regulates actin remodeling in cell migration by activating PI3K/AKT/Cdc42 pathway. *Front. Pharmacol.* 10:370.
- Narumiya, S., and D. Thumkeo. 2018. Rho signaling research: history, current status and future directions. *FEBS Lett.* 592:1763–1776.
- Pichaud, F., R. F. Walther, and F. Nunes de Almeida. 2019. Regulation of Cdc42 and its effectors in epithelial morphogenesis. *J. Cell Sci.* 132:jcs217869.
- Huang, Q.-Y., X.-N. Lai, ..., L.-X. Xiong. 2019. Cdc42: a novel regulator of insulin secretion and diabetes-associated diseases. *Int. J. Mol. Sci.* 20:179.
- Bustelo, X. R. 2018. RHO GTPases in cancer: known facts, open questions, and therapeutic challenges. *Biochem. Soc. Trans.* 46:741–760.
- Maldonado, M. D. M., and S. Dharmawardhane. 2018. Targeting Rac and Cdc42 GTPases in cancer. *Cancer Res.* 78:3101–3111.
- Morris, L. E., G. S. Bloom, ..., S. M. Powell. 2005. Nucleotide variants within the IQGAP1 gene in diffuse-type gastric cancers. *Genes Chromosomes Cancer.* 42:280–286.
- Cardama, G. A., N. Gonzalez, ..., D. E. Gomez. 2017. Rho GTPases as therapeutic targets in cancer (Review). *Int. J. Oncol.* 51:1025–1034.
- Lamas, I., L. Merlini, ..., S. G. Martin. 2020. Optogenetics reveals Cdc42 local activation by scaffold-mediated positive feedback and Ras GTPase. *PLoS Biol.* 18:e3000600.
- Maldonado, M. D. M., J. I. Medina, ..., S. Dharmawardhane. 2020. Targeting Rac and Cdc42 GEFs in metastatic cancer. *Front. Cell Dev. Biol.* 8:201.
- Pálffy, G., I. Vida, and A. Perczel. 2020.  $^1\text{H}$ ,  $^{15}\text{N}$  backbone assignment and comparative analysis of the wild type and G12C, G12D, G12V mutants of K-Ras bound to GDP at physiological pH. *Biomol. NMR Assign.* 14:1–7.
- Hall, A. 1998. Rho GTPases and the actin cytoskeleton. *Science.* 279:509–514.
- Stengel, K., and Y. Zheng. 2011. Cdc42 in oncogenic transformation, invasion, and tumorigenesis. *Cell. Signal.* 23:1415–1423.
- Aspenström, P. 2018. Activated Rho GTPases in cancer—the beginning of a new paradigm. *Int. J. Mol. Sci.* 19:3949.

19. Wennerberg, K., K. L. Rossman, and C. J. Der. 2005. The Ras superfamily at a glance. *J. Cell Sci.* 118:843–846.
20. Castellano, E., and E. Santos. 2011. Functional specificity of ras isoforms: so similar but so different. *Genes Cancer* 2:216–231.
21. Vetter, I. R., and A. Wittinghofer. 2001. The guanine nucleotide-binding switch in three dimensions. *Science*. 294:1299–1304.
22. Liao, T.-J., H. Jang, ..., R. Nussinov. 2018. Allosteric KRas4B can modulate SOS1 fast and slow Ras activation cycles. *Biophys. J.* 115:629–641.
23. Morris, K. M., R. Henderson, ..., P. D. Adams. 2016. Intrinsic GTP hydrolysis is observed for a switch I variant of Cdc42 in the presence of a specific GTPase inhibitor. *Small GTPases*. 7:1–11.
24. Li, Y., Y. Zhang, ..., K. Gerwert. 2018. Specific substates of Ras to interact with GAPs and effectors: revealed by theoretical simulations and FTIR experiments. *J. Phys. Chem. Lett.* 9:1312–1317.
25. Dudas, B., F. Merzel, ..., E. Balog. 2020. Nucleotide-specific autoinhibition of full-length K-Ras4B identified by extensive conformational sampling. *Front. Mol. Biosci.* 7:145.
26. Kumar, A. P., C. S. Verma, and S. Lukman. 2020. Structural dynamics and allostery of Rab proteins: strategies for drug discovery and design. *Brief. Bioinform* Published online January 17, 2020. <https://doi.org/10.1093/bib/bbz161>.
27. Wu, W. J., D. A. Leonard, ..., D. Manor. 1997. Interaction between Cdc42Hs and RhoGDI is mediated through the Rho insert region. *J. Biol. Chem.* 272:26153–26158.
28. Walker, S. J., W. J. Wu, ..., H. A. Brown. 2000. Activation of phospholipase D1 by Cdc42 requires the Rho insert region. *J. Biol. Chem.* 275:15665–15668.
29. Miyano, K., H. Koga, ..., H. Sumimoto. 2009. The insert region of the Rac GTPases is dispensable for activation of superoxide-producing NADPH oxidases. *Biochem. J.* 422:373–382.
30. Kukimoto-Niino, M., K. Tsuda, ..., M. Shirouzu. 2019. Structural basis for the dual substrate specificity of DOCK7 guanine nucleotide exchange factor. *Structure*. 27:741–748.e3.
31. Kang, N., J. Liu, and Y. Zhao. 2019. Dissociation mechanism of GDP from Cdc42 via DOCK9 revealed by molecular dynamics simulations. *Proteins*. 87:433–442.
32. Sahai, E., A. S. Alberts, and R. Treisman. 1998. RhoA effector mutants reveal distinct effector pathways for cytoskeletal reorganization, SRF activation and transformation. *EMBO J.* 17:1350–1361.
33. Jansson, T., M. Castillo-Castrejon, ..., F. J. Rosario. 2020. Down-regulation of placental Cdc42 and Rac1 links mTORC2 inhibition to decreased trophoblast amino acid transport in human intrauterine growth restriction. *Clin. Sci. (Lond.)*. 134:53–70.
34. Ozdemir, E. S., H. Jang, ..., R. Nussinov. 2018. Unraveling the molecular mechanism of interactions of the Rho GTPases Cdc42 and Rac1 with the scaffolding protein IQGAP2. *J. Biol. Chem.* 293:3685–3699.
35. Heo, W. D., and T. Meyer. 2003. Switch-of-function mutants based on morphology classification of Ras superfamily small GTPases. *Cell*. 113:315–328.
36. Vatansever, S., B. Erman, and Z. H. Gümüş. 2020. Comparative effects of oncogenic mutations G12C, G12V, G13D, and Q61H on local conformations and dynamics of K-Ras. *Comput. Struct. Biotechnol. J.* 18:1000–1011.
37. Melendez, J., M. Grogg, and Y. Zheng. 2011. Signaling role of Cdc42 in regulating mammalian physiology. *J. Biol. Chem.* 286:2375–2381.
38. Martinelli, S., O. H. F. Krumbach, ..., G. M. Mirzaa; University of Washington Center for Mendelian Genomics. 2018. Functional dysregulation of CDC42 causes diverse developmental phenotypes. *Am. J. Hum. Genet.* 102:309–320.
39. Chandrashekar, R., O. Salem, ..., P. D. Adams. 2011. A switch I mutant of Cdc42 exhibits less conformational freedom. *Biochemistry*. 50:6196–6207.
40. Lu, S., H. Jang, ..., J. Zhang. 2016. Ras conformational ensembles, allostery, and signaling. *Chem. Rev.* 116:6607–6665.
41. Bera, A. K., J. Lu, ..., K. D. Westover. 2020. GTP hydrolysis is modulated by Arg34 in the RASopathy-associated KRAS<sup>P34R</sup>. *Birth Defects Res.* 112:708–717.
42. Zanuy, D., R. Kotla, ..., N. Haspel. 2013. Sequence dependence of C-end rule peptides in binding and activation of neuropilin-1 receptor. *J. Struct. Biol.* 182:78–86.
43. Tichauer, R. H., G. Favre, ..., M. Brut. 2018. Water distribution within wild-type NRas protein and Q61 mutants during unrestrained QM/MM dynamics. *Biophys. J.* 115:1417–1430.
44. Arrington, M. E., B. Temple, ..., S. L. Campbell. 2020. The molecular basis for immune dysregulation by the hyperactivated E62K mutant of the GTPase RAC2. *J. Biol. Chem.* 295:12130–12142.
45. Khrenova, M. G., V. A. Mironov, ..., A. V. Nemukhin. 2014. Modeling the role of G12V and G13V Ras mutations in the Ras-GAP-catalyzed hydrolysis reaction of guanosine triphosphate. *Biochemistry*. 53:7093–7099.
46. Grigorenko, B. L., E. D. Kots, and A. V. Nemukhin. 2019. Diversity of mechanisms in Ras-GAP catalysis of guanosine triphosphate hydrolysis revealed by molecular modeling. *Org. Biomol. Chem.* 17:4879–4891.
47. Hunter, J. C., A. Manandhar, ..., K. D. Westover. 2015. Biochemical and structural analysis of common cancer-associated KRAS mutations. *Mol. Cancer Res.* 13:1325–1335.
48. Lu, S., H. Jang, ..., J. Zhang. 2016. The structural basis of oncogenic mutations G12, G13 and Q61 in small GTPase K-Ras4B. *Sci. Rep.* 6:21949.
49. Nussinov, R., H. Jang, ..., F. Cheng. 2019. Precision medicine review: rare driver mutations and their biophysical classification. *Biophys. Rev.* 11:5–19.
50. Chakrabarti, M., H. Jang, and R. Nussinov. 2016. Comparison of the conformations of KRAS isoforms, K-Ras4A and K-Ras4B, points to similarities and significant differences. *J. Phys. Chem. B.* 120:667–679.
51. LeCour, L., Jr., V. K. Boyapati, ..., D. K. Worthylake. 2016. The structural basis for cdc42-induced dimerization of IQGAPs. *Structure*. 24:1499–1508.
52. Lam, B. D., and P. L. Hordijk. 2013. The Rac1 hypervariable region in targeting and signaling: a tail of many stories. *Small GTPases*. 4:78–89.
53. Johnson, D. I. 1999. Cdc42: an essential Rho-type GTPase controlling eukaryotic cell polarity. *Microbiol. Mol. Biol. Rev.* 63:54–105.
54. Johnson, J. L., J. W. Erickson, and R. A. Cerione. 2012. C-terminal diarginine motif of Cdc42 protein is essential for binding to phosphatidylinositol 4,5-bisphosphate-containing membranes and inducing cellular transformation. *J. Biol. Chem.* 287:5764–5774.
55. Beaumont, V. A., K. Reiss, ..., J. P. Loria. 2020. Allosteric impact of the variable insert loop in vaccinia H1-related (VHR) phosphatase. *Biochemistry*. 59:1896–1908.
56. Ruan, Z., and N. Kannan. 2018. Altered conformational landscape and dimerization dependency underpins the activation of EGFR by  $\alpha$ C- $\beta$ 4 loop insertion mutations. *Proc. Natl. Acad. Sci. USA*. 115:E8162–E8171.
57. Yeung, W., Z. Ruan, and N. Kannan. 2020. Emerging roles of the  $\alpha$ C- $\beta$ 4 loop in protein kinase structure, function, evolution, and disease. *IUBMB Life*. 72:1189–1202.
58. Pantsar, T. 2020. KRAS(G12C)-AMG 510 interaction dynamics revealed by all-atom molecular dynamics simulations. *Sci. Rep.* 10:11992.
59. Khaled, M., A. Gorfe, and A. Sayyed-Ahmad. 2019. Conformational and dynamical effects of Tyr32 phosphorylation in K-Ras: molecular dynamics simulation and Markov state models analysis. *J. Phys. Chem. B.* 123:7667–7675.
60. Pantsar, T. 2019. The current understanding of KRAS protein structure and dynamics. *Comput. Struct. Biotechnol. J.* 18:189–198.
61. Knihtila, R., A. Y. Volmar, ..., C. Mattos. 2019. Titration of ionizable groups in proteins using multiple neutron data sets from a single crystal: application to the small GTPase Ras. *Acta Crystallogr. F Struct. Biol. Commun.* 75:111–115.

62. Brooks, B., R. E. Bruccoleri, ..., M. Karplus. 1983. CHARMM: a program for macromolecular energy, minimization, and dynamics calculations. *J. Comput. Chem.* 4:187–217.
63. Phillips, J. C., R. Braun, ..., K. Schulten. 2005. Scalable molecular dynamics with NAMD. *J. Comput. Chem.* 26:1781–1802.
64. Jang, H., A. Banerjee, ..., R. Nussinov. 2016. The higher level of complexity of K-Ras4B activation at the membrane. *FASEB J.* 30:1643–1655.
65. Humphrey, W., A. Dalke, and K. Schulten. 1996. VMD: visual molecular dynamics. *J. Mol. Graph.* 14:33–38, 27–28.
66. Bakan, A., L. M. Meireles, and I. Bahar. 2011. ProDy: protein dynamics inferred from theory and experiments. *Bioinformatics.* 27:1575–1577.
67. Nouri, K., D. J. Timson, and M. R. Ahmadian. 2020. New model for the interaction of IQGAP1 with CDC42 and RAC1. *Small GTPases.* 11:16–22.
68. Tee, W.-V., E. Guarnera, and I. N. Berezovsky. 2020. Disorder driven allosteric control of protein activity. *Curr. Res. Struct. Biol.* 2:191–203.
69. Guarnera, E., and I. N. Berezovsky. 2020. Allosteric drugs and mutations: chances, challenges, and necessity. *Curr. Opin. Struct. Biol.* 62:149–157.
70. Tee, W.-V., E. Guarnera, and I. N. Berezovsky. 2019. On the allosteric effect of nsSNPs and the emerging importance of allosteric polymorphism. *J. Mol. Biol.* 431:3933–3942.
71. Hodge, R. G., A. Schaefer, ..., C. J. Der. 2020. RAS and RHO family GTPase mutations in cancer: twin sons of different mothers? *Crit. Rev. Biochem. Mol. Biol.* 55:386–407.

**Biophysical Journal, Volume 120**

**Supplemental Information**

**Active and Inactive Cdc42 Differ in Their Insert Region Conformational  
Dynamics**

**Nurit Haspel, Hyunbum Jang, and Ruth Nussinov**

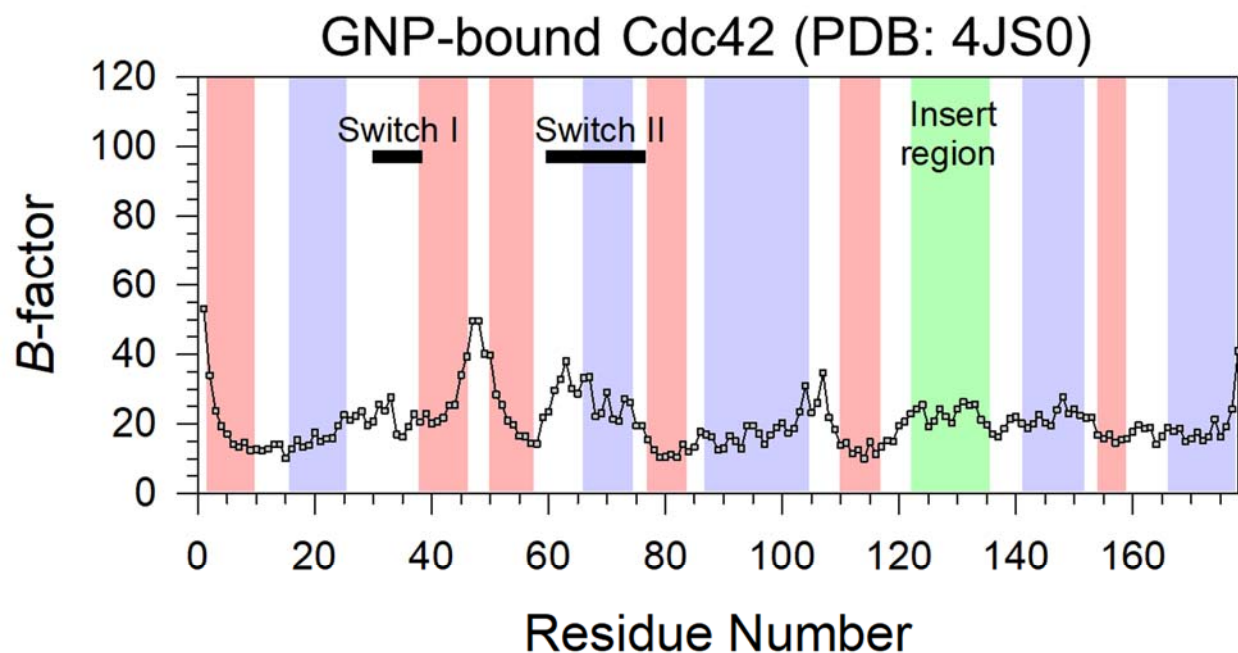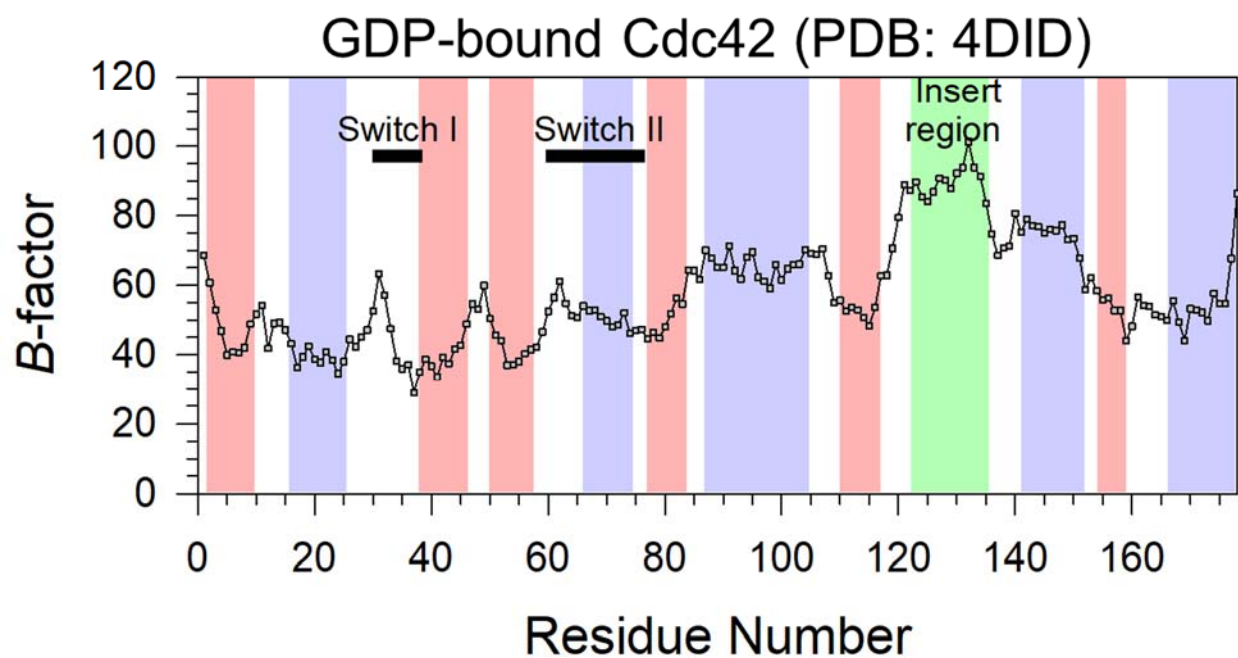

**FIGURE S1** The *B*-factor or temperature factor of the crystal structures of Cdc42 in the GNP-bound (PDB: 4JS0) and GDP-bound (PDB: 4DID) states. The *B*-factor values denote the C $\alpha$  atom of each residue in the protein.

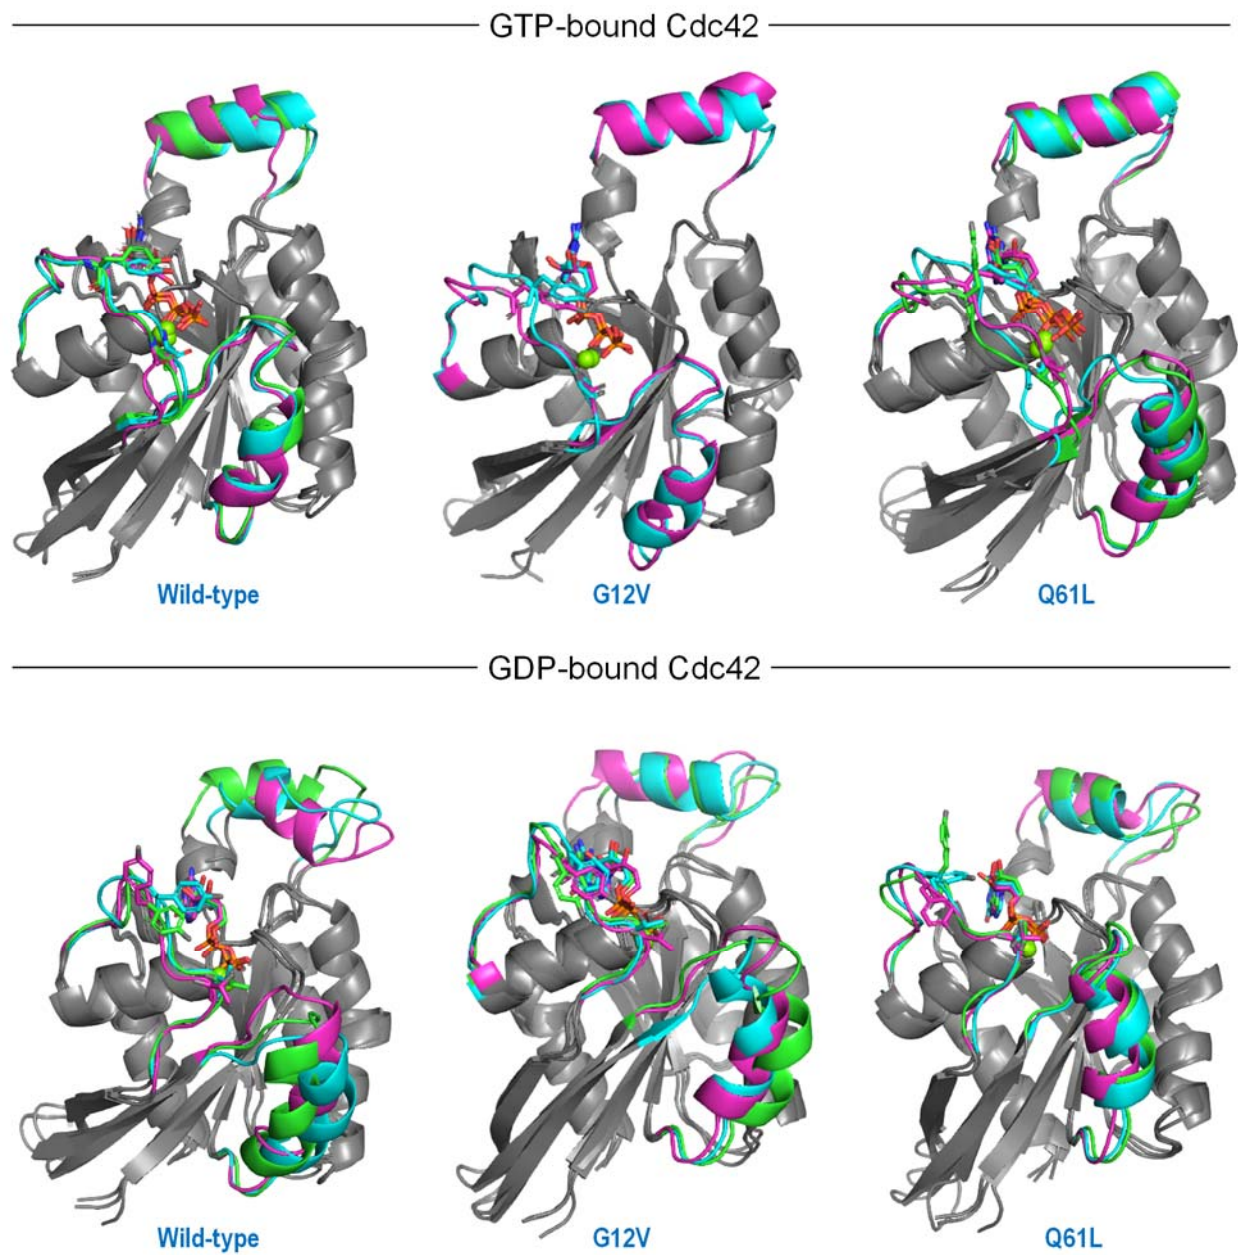

**FIGURE S2** Representative conformations of the clusters detected in the PCA projection for the GTP-bound (upper panels) and GDP-bound (lower panels) Cdc42. Each cluster is shown in a different color: cluster 1, green; cluster 2, cyan; cluster 3, magenta. For the GTP-G12V mutant only two clusters were found. Cluster 1 is in cyan and cluster 2 in magenta.



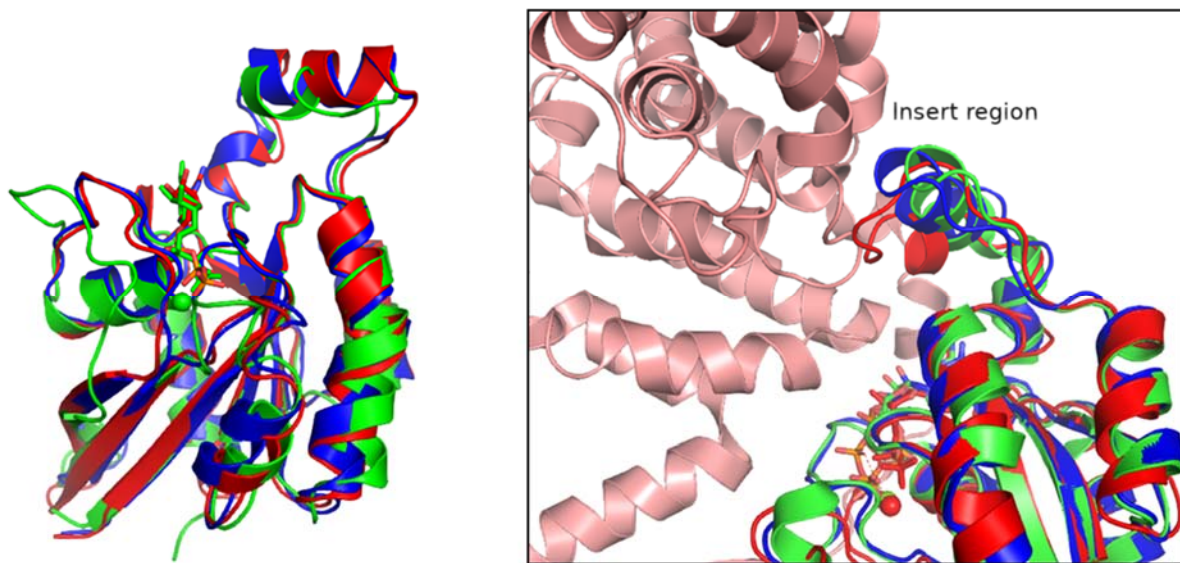

**FIGURE S3** A superimposition of the most populated cluster from the GDP-bound (green) and GTP-bound (blue) Cdc42 with the active Cdc42 (red) taken from the crystal structure of Cdc42-IQGAP2 complex (PDB: 5CJP) (left panel). A closeup of the three Cdc42 molecules interacting with IQGAP2 GRD (pink) as appears in the crystal structure (right panel).

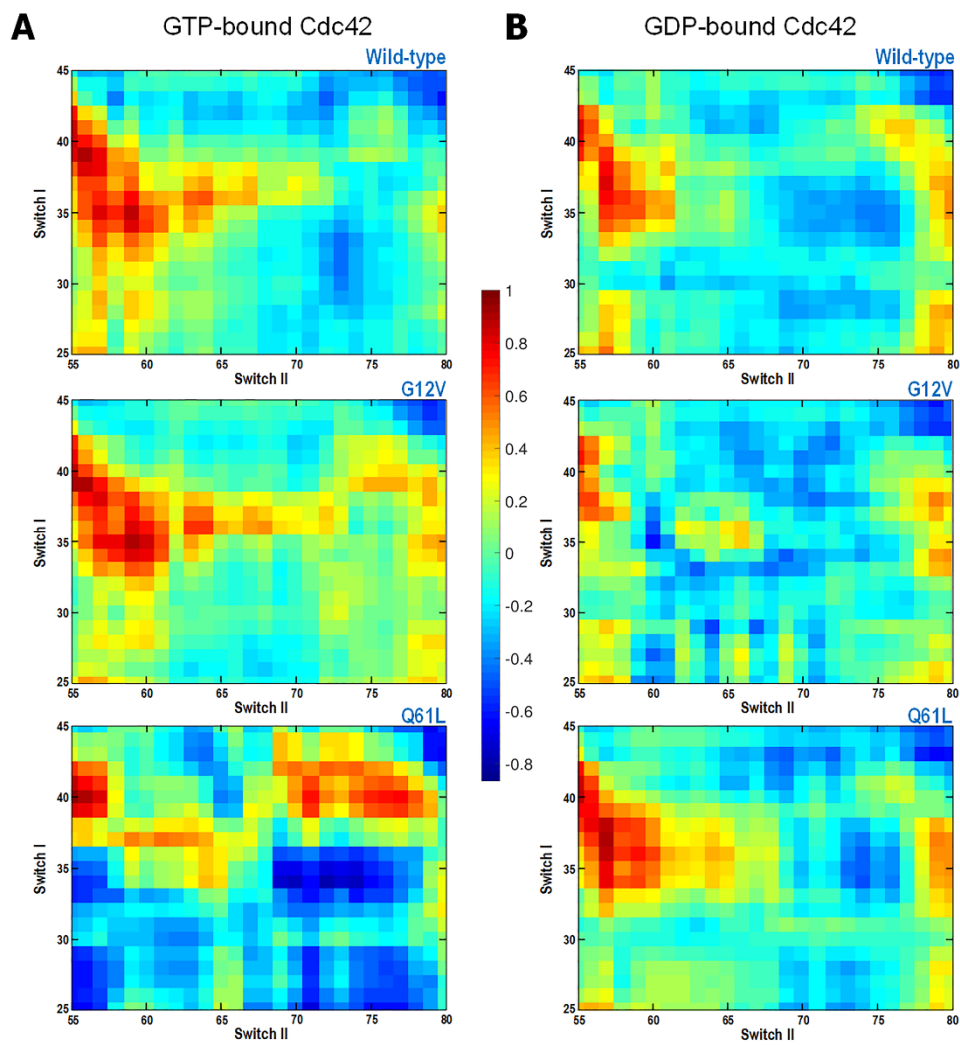

**FIGURE S4** Dynamic cross-correlation map representing the covariance of residues between Switch I and II for (A) the GTP-bound and (B) GDP-bound systems of Cdc42.

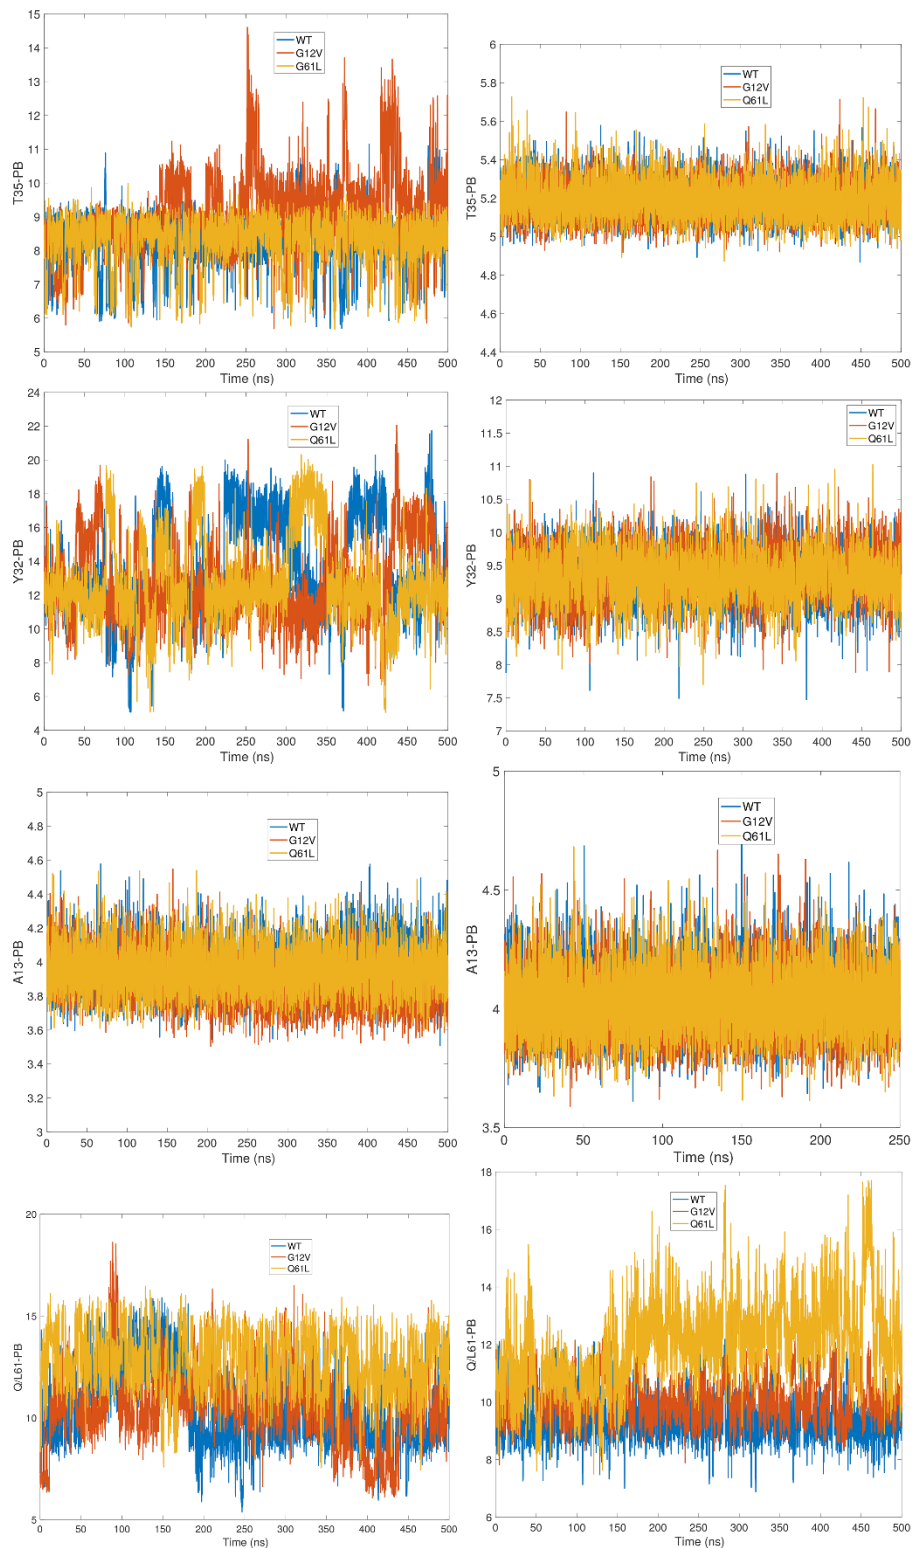

**FIGURE S5** Time series of the distances from the  $C\alpha$  atom of Ala13, the OH group of Tyr32, the  $O\gamma$  group of Thr35, and the  $C\delta$  atom of Gln61 to the  $P\beta$  atom. Left column: GDP-bound systems. Right column: GTP-bound systems.

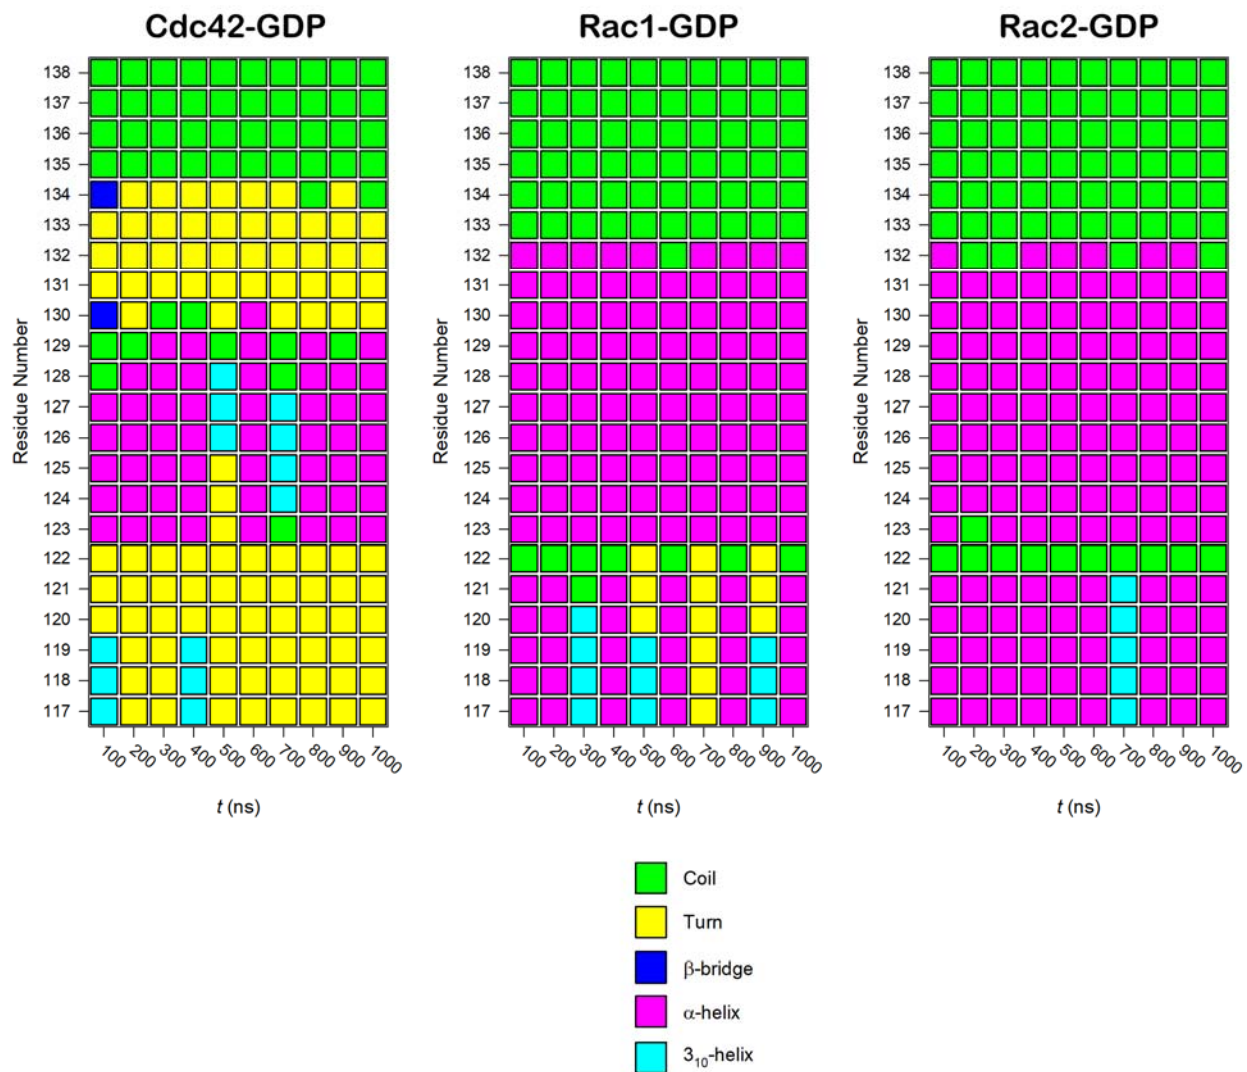

**FIGURE S6** Descriptions of the secondary structure by the STRIDE program for the insert regions of Cdc42-GDP (left panel), Rac1-GDP (middle panel), and Rac2-GDP (right panel) depicted each 100 ns interval.

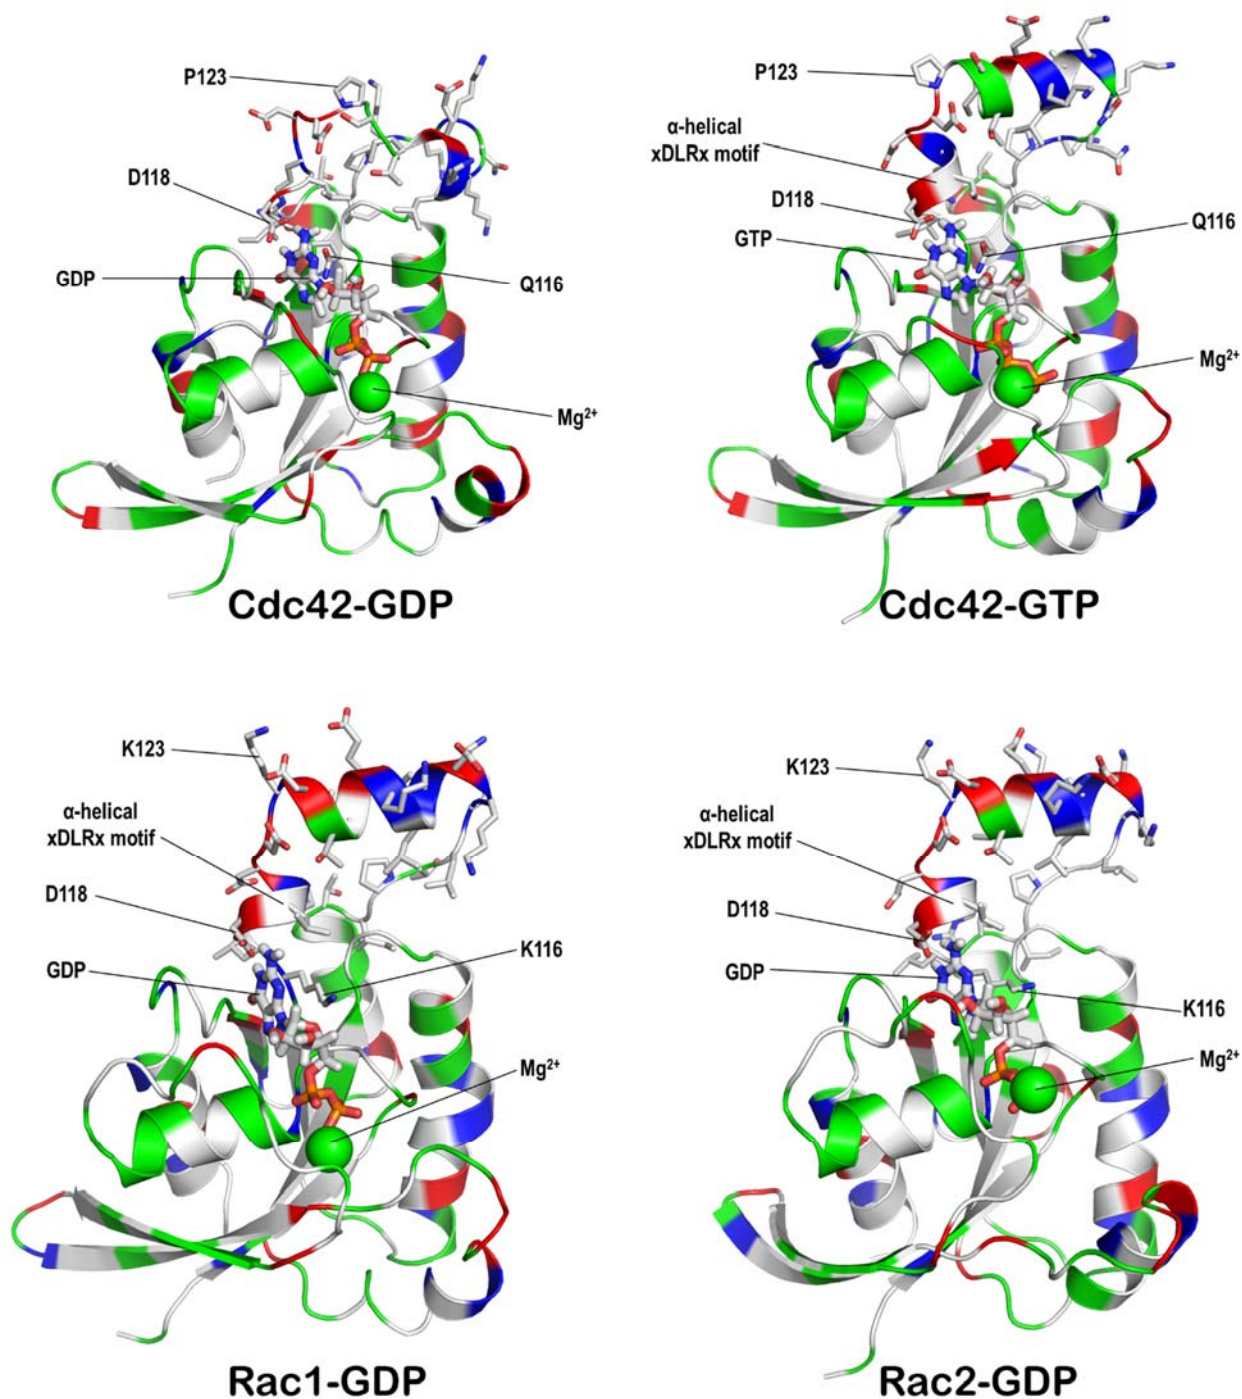

**FIGURE S7** Snapshots representing the final structures for Cdc42-GDP, Cdc42-GTP, Rac1-GDP, and Rac2-GDP. In the protein structures, hydrophobic, polar/glycine, positively charged, and negatively charged residues are colored white, green, blue, and red, respectively. Sticks denote the side chains of the residues in the insert region and adjacent regions. Key residues and the helix-forming  $^{117}\text{xDLRx}^{121}$  motif are marked.
